# Supplementary material
Source: Royal Society of Chemistry journal article supplement (doi:10.1039/d6gc00553e)
Supplement: d6gc00553e1.pdf [file d6gc00553e1.pdf]

## Supporting Information

### **PFAS-free quasi-solid polymer electrolytes with enhanced performance for sustainable lithium-ion batteries**

Wei-Chi Lai,<sup>\*a</sup> Li-En Chen,<sup>a</sup> Shen-Jhen Tseng,<sup>a</sup> Chun-Wai Chang,<sup>b</sup> and Zhenxing Feng<sup>b</sup>

<sup>a</sup>Department of Chemical and Materials Engineering, Tamkang University, No.151, Yingzhuang Rd., Tamsui Dist., New Taipei City 25137, Taiwan

<sup>b</sup>School of Chemical, Biological, and Environmental Engineering, Oregon State University, Corvallis, Oregon 97331, United States

\*Corresponding author: [wclai@mail.tku.edu.tw](mailto:wclai@mail.tku.edu.tw)

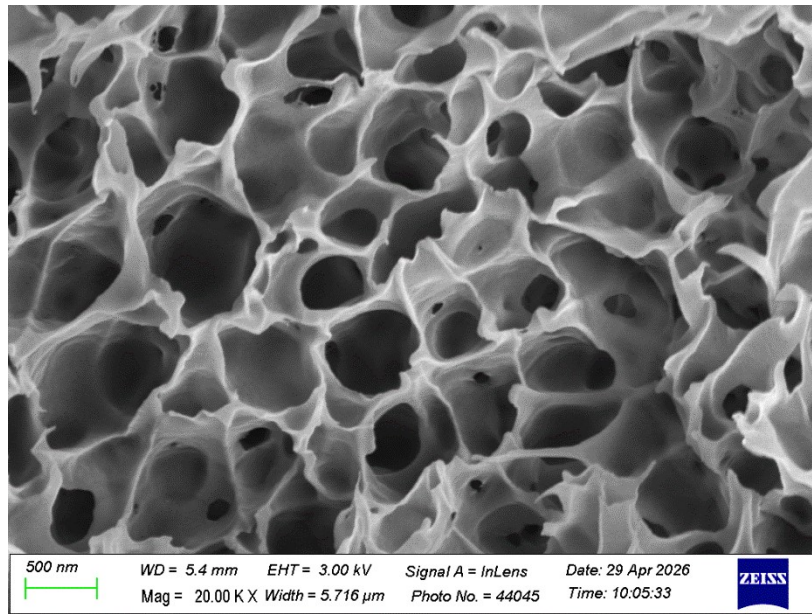

**Figure S1.** SEM images of cross-sections of PES membranes at higher magnification.

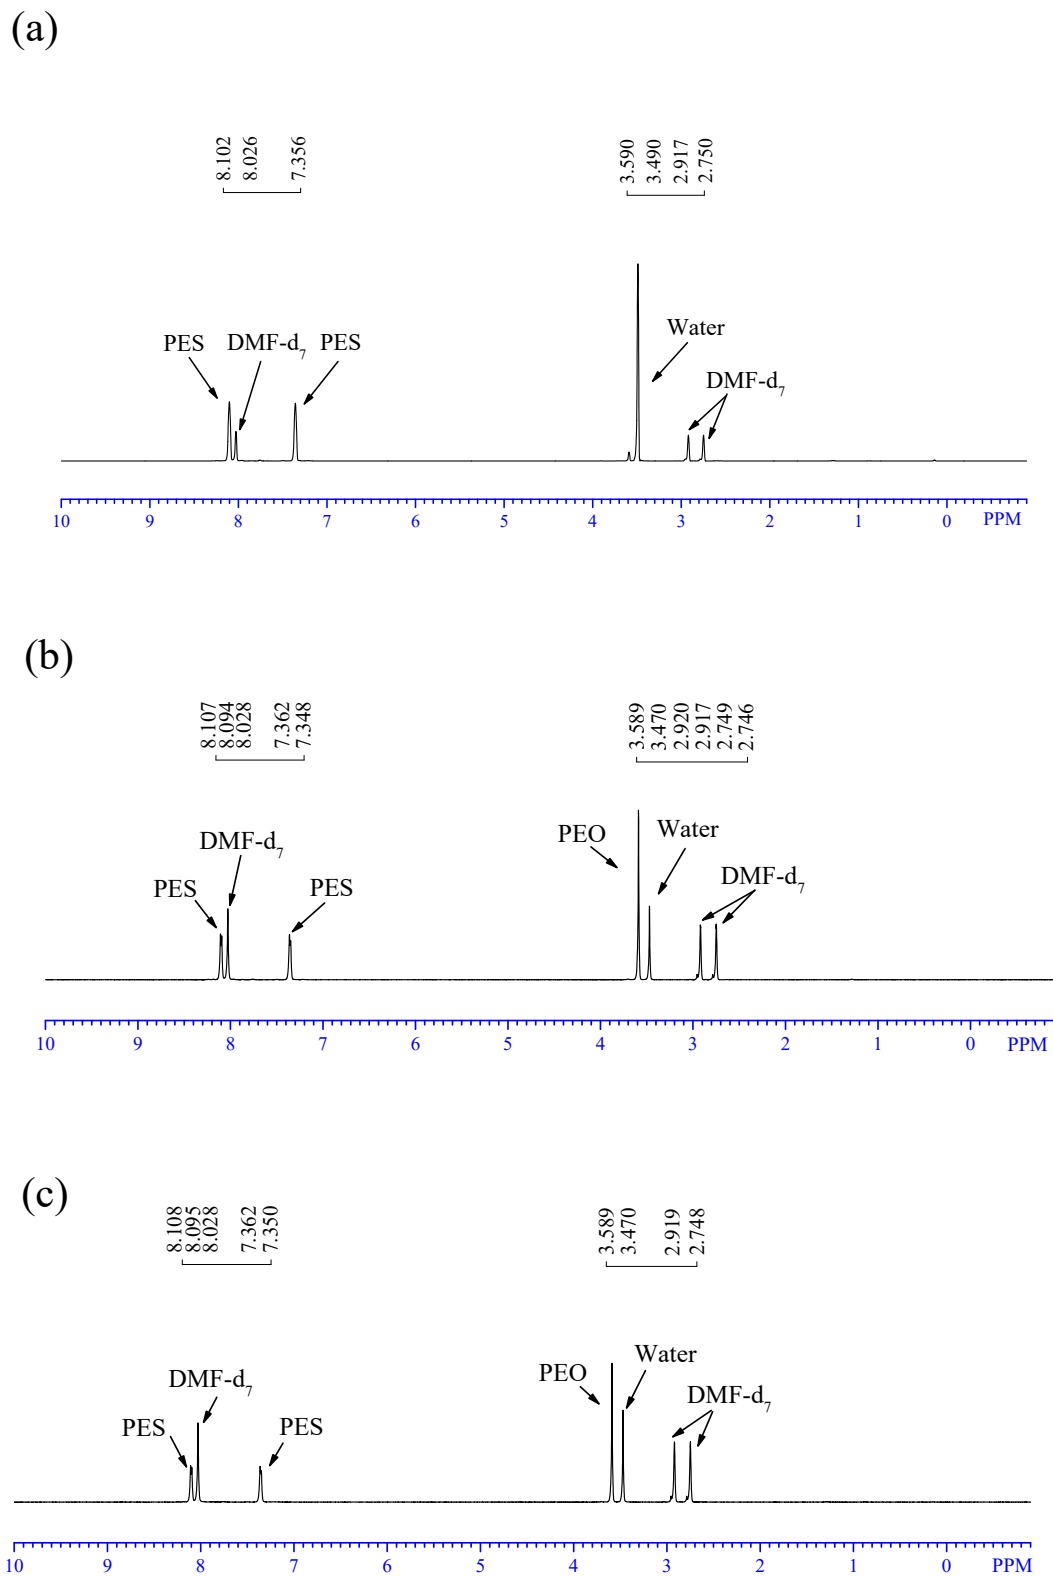

**Figure S2.**  $^1\text{H}$  NMR spectra of the prepared (a) PES, (b) PES/PEO (14/10), and (c) PES/PEO (14/18)

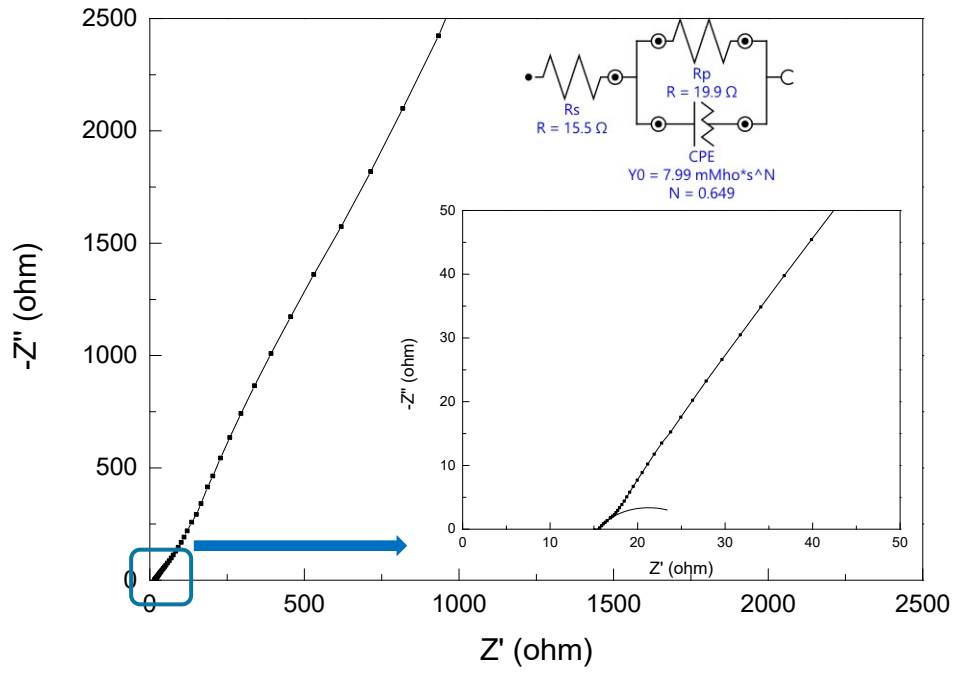

**Figure S3.** Fitted EIS spectra and the corresponding equivalent circuit diagrams of PES QSPEs at room temperature.

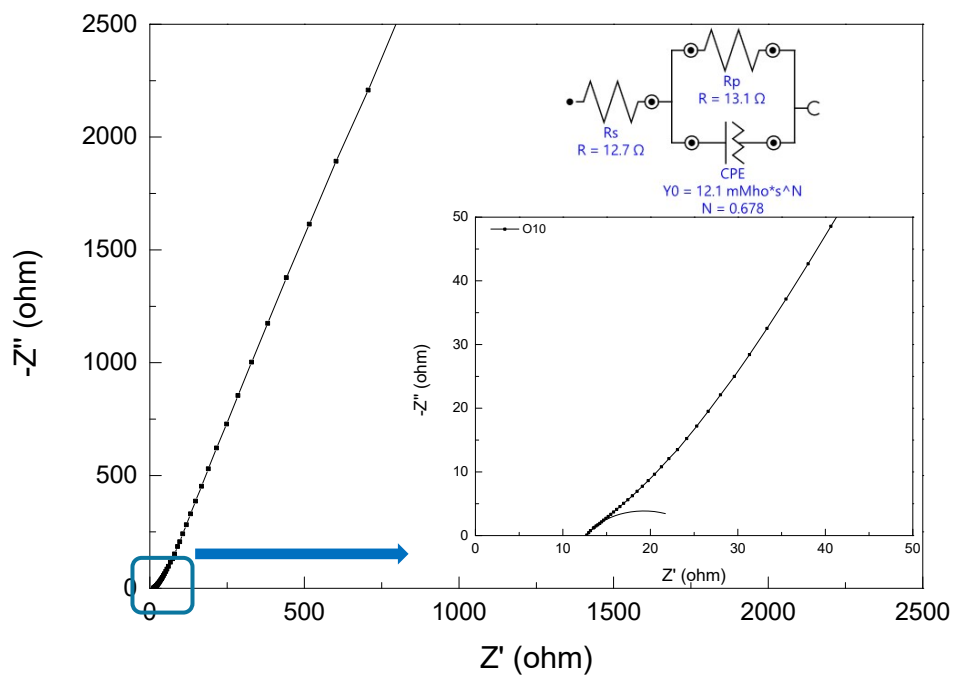

**Figure S4.** Fitted EIS spectra and the corresponding equivalent circuit diagrams of PES/PEO (14/10) QSPEs at room temperature.

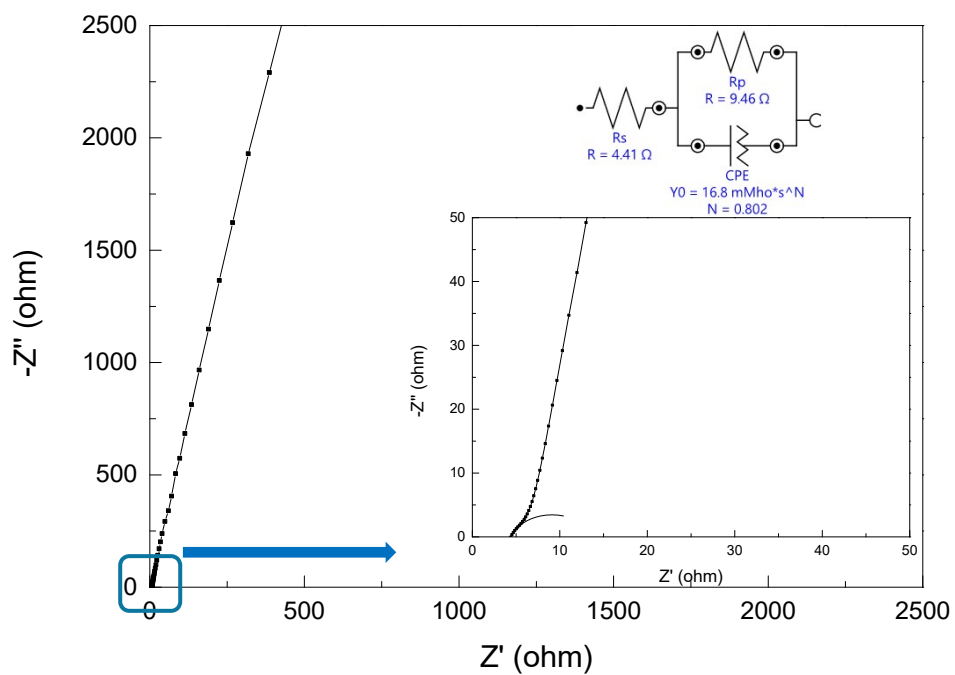

**Figure S5.** Fitted EIS spectra and the corresponding equivalent circuit diagrams of PES/PEO (14/18) QSPEs at room temperature.

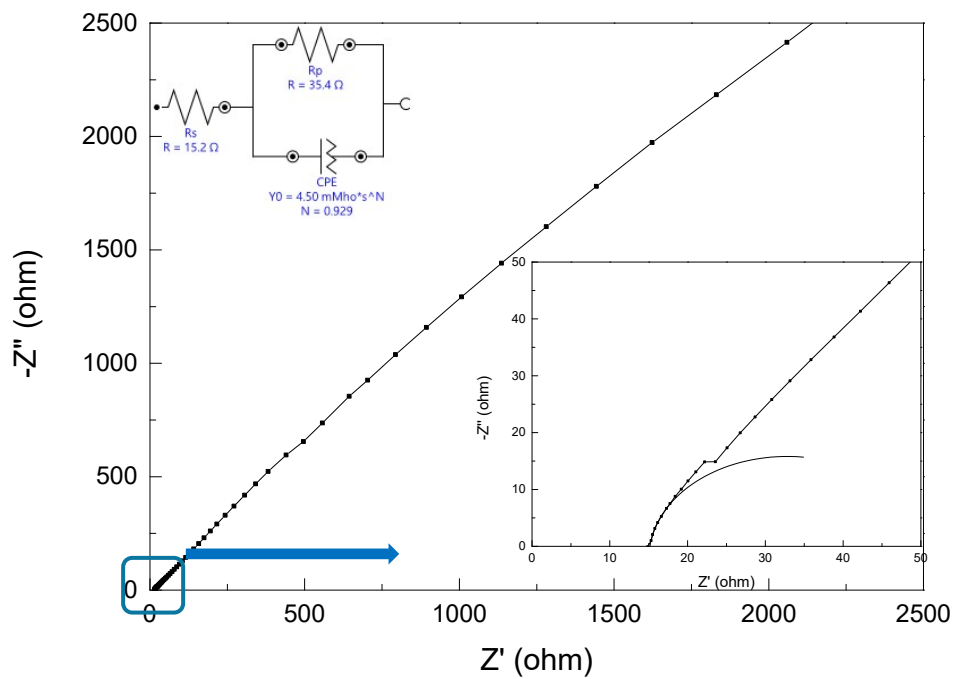

**Figure S6.** Fitted EIS spectra and the corresponding equivalent circuit diagrams of Celgard 2325 at room temperature.
